# Habitat affinity and density-dependent movement as indicators of fish habitat restoration efficacy

CARLOS M. POLIVKA\*<sup>1</sup>

<sup>1</sup>*Pacific Northwest Research Station, USDA Forest Service, Wenatchee, WA 98801*

July 11, 2019

*Abstract.* In mark-recapture assays from four different study years, the affinity of young-of-the-year Chinook Salmon (*Oncorhynchus tshawytscha*) and steelhead (*O. mykiss*) for stream pools restored with or created by engineered log structures was greater than that for pools without restoration, though with high interannual variability. From corresponding distribution and abundance data, it was clear that behavioral data are not always concordant with single observations of abundance. The same was true of the correlation between either behavior or abundance and physical characteristics of pools, although depth and current velocity had some explanatory power for both responses in Chinook. Density-dependent immigration into pools by Chinook indicated that restored pools have greater capacity for this species than unrestored pools; however no such pattern emerged for steelhead. Variation among individuals in body condition has implications for population-wide fitness and low variation was correlated with stronger affinity for pools. This suggests that pools mediate habitat-related trade-offs and that restoring them might have positive effects on fitness. Thus, behavioral data appear to provide stronger indications of restoration effectiveness than observational data alone.

*Key words:* habitat selection, density-dependence, salmonids, restoration, state-dependence.

---

\*carlos.polivka@usda.gov

## INTRODUCTION

Structures placed in streams to create or augment pools are a significant part of restoration efforts in the Pacific Northwest (Roni et al. 2002) because these habitats are important to the rearing phase of the life cycle of salmonids (Roni et al. 2008). For conservation agencies to evaluate effectiveness of restoration efforts, appropriate metrics are required (Block et al. 2001). However, such studies usually rely upon comparisons of distribution of individuals among both restored and unrestored habitat (Bond and Lake 2003, Roni et al. 2008). This is an important basis for evaluation, but much of the literature shows small or no effects of restoration when only distribution and abundance are considered (Roni et al. 2008, Whiteway et al. 2010, Stranko et al. 2012). Furthermore, the inferential power of the results is limited by inadequate replication of structures or and observational scale mismatched with treatment scale (Roni et al. 2002, McMillan et al. 2013, Freedman et al. 2016, K. M. Polivka, R. A. Volking, S. M. Claeson, and R. D. Hosman *in press*), limiting the ability to detect and quantify the seasonal, annual, and among-species distribution patterns (Bradford and Higgins 2001). This does not necessarily indicate poorly placed or targeted restoration activities, but rather the need for consideration of more robust metrics of habitat selection, including those that more directly describe behavior (Kotler et al. 2016). These can include: 1) site fidelity, 2) density dependent movement, and 3) dependence of traits correlated with fitness, like body condition, on habitat selection related movement, all of which can be studied with relatively simple mark-recapture assays.

Site fidelity describes affinity to a habitat type, in which individuals maintain territories and/or to which they return after life-history-related movements or some other displacement (Greenwood 1980, Merkle et al. 2014). This behavior is presumably driven by habitat effects on fitness (e.g., growth, survival) that can vary at different spatial and temporal scales (Switzer 1993). Affinity of fish to relatively small activity centers, sometimes even as small as a single stream pool, can be identified by mark-recapture studies (Borkholder et al. 2002). Mark-recapture studies in stream salmonids have shown how movement and site fidelity of individuals can vary widely at the site or reach scales (Kahler et al. 2001, Sogard et al. 2009, Myrvold and Kennedy 2016). Movement at the scale of microhabitat types (e.g., stream pools), however, can be independent of reach-scale movement (Rodríguez 2002).

30 Density dependence may determine the capacity of a habitat for further immigration and de-  
31 pends on the current occupancy of that habitat. In behavioral ecology, ideal free distribution theory  
32 (Fretwell and Lucas 1970, Kennedy and Gray 1993, Houston 2008) describes the density depen-  
33 dent settlement of unoccupied habitat. At low density, there is movement of individuals sampling  
34 the mosaic of habitat patches for the optimal one and immigration attraction to that habitat may be  
35 low. As settlement of habitats proceeds, under IFD assumptions, better habitat can support increas-  
36 ing levels of immigration and settlement until it reaches capacity at some optimal density. Then, at  
37 higher density, individuals are less likely to immigrate to or remain in the habitat due to crowding;  
38 thus immigration will decrease again and emigration will increase (Morris 1988). Observations  
39 of density-dependent immigration into a habitat patch (or emigration out) can therefore indicate  
40 differences in habitat capacity (Gundersen et al. 2002, Rémy et al. 2014). For a given density of  
41 individuals occupying the patch, better habitat will support more immigrants.

42 Resource-driven habitat affinity at the microhabitat scale for fish can involve habitat features  
43 such as food availability and cover from predation risk (Giannico and Healey 1999), both of which  
44 can be affected by in-stream habitat restoration. Foraging opportunities and cover are complemen-  
45 tary resources that often contrast among habitat patches, among which individuals move according  
46 to the current levels of risk and food availability (Cresswell 1998, Brown and Kotler 2004). In  
47 streams, shallower, faster current velocity habitats offer rapid delivery of drifting aquatic macroin-  
48 vertebrates as food, but higher risk of predation, particularly by avian predators. Deeper pools  
49 created by log structures, on the other hand, often offer cover from predators, but slower delivery  
50 of food. Individual based models have made predictions of movement between these complemen-  
51 tary habitat types (Railsback et al. 1999, Railsback and Harvey 2002).

52 Use of complementary habitats among fish (Alofs and Polivka 2004, Polivka 2007, Ferrari et al.  
53 2010) can depend on and affect an individual's physiological condition (McNamara and Houston  
54 1990, Houston et al. 1993, Polivka 2011). The "asset protection principle" (Clark 1994) predicts  
55 that individuals in reduced condition take greater risks to obtain food, whereas individuals in good  
56 condition remain in safe patches, taking few foraging risks. This results in reduced variability in  
57 condition among individuals as poor-condition individuals succumb to predation and decreased  
58 foraging by individuals in good condition reduces energy reserves (Kotler et al. 2010, Polivka  
59 2011) Selective predation on individuals in the best condition can also remove them from the

60 population (Sinclair and Arcese 1995, Cresswell 1998). The end result is a high frequency of  
61 individual condition levels near the population average which can increase average survival at the  
62 population level (Polivka 2011). The complementary nature of pool habitat and shallower, faster-  
63 flowing habitat (Railsback et al. 1999, Railsback and Harvey 2002) would suggest that greater  
64 affinity for pools may be associated with reduced condition variability. Thus, augmenting pools  
65 with restoration structures and/or increasing pool frequency by adding structures may have positive  
66 fitness benefits to drive population growth.

67 In this multi-year study, I used mark-recapture assays over a short (24-hr) period to show  
68 that sub-yearling Chinook Salmon (*Oncorhynchus tshawytscha*) and steelhead trout (*O. mykiss*)  
69 have stronger affinity for restored habitat compared with unrestored habitat, at least across all  
70 years combined. Spatial, temporal, and among-species differences indicated by behavioral data  
71 showed that distribution and abundance data are not always indicative of habitat selection patterns.  
72 There was also evidence of density- and state-dependent movement. First, across the range of  
73 density of fish occupying the pool from Day 1 to Day 2, restored pools supported more immigrants  
74 than unrestored pools and thus restoration appears to increase capacity. Second, I calculated a  
75 condition index from size data on each individual and found a correlation between variation in  
76 body condition among individuals and affinity for pools. The key finding of this approach is that  
77 extending restoration effectiveness studies a step beyond distribution and abundance observations  
78 can uncover some of the mechanistic detail needed to better understand fish response to habitat  
79 restoration.

## 80 METHODS

### 81 *Study System*

82 The Entiat River is a major tributary sub-basin of the Interior Columbia River Basin in north central  
83 Washington State, USA. Its confluence with the Columbia River is at 49.657° N, 120.224° W. In  
84 this sub-basin, a common habitat restoration action is construction of in-stream structures to create  
85 rearing pools for young-of-the-year Chinook salmon (listed as endangered) and steelhead (listed  
86 as threatened). Restoration is linked with multi-agency monitoring to evaluate its effectiveness  
87 (Bennett et al. 2016). Chinook juveniles rear in stream pools and emigrate out of the sub-basin to

88 the mainstem Columbia River if suitable overwintering habitat is not available in the river (Hillman  
89 et al. 1987), with smolt outmigration after one year of freshwater residency. Steelhead can rear in  
90 the streams for 1-3 years before outmigration. Predation risk primarily comes from birds (belted  
91 kingfisher, *Ceryle alcyon*; great blue heron, *Ardea herodias*) and semi-aquatic mammals (e.g., river  
92 otter, *Lontra canadensis*). Larger, predatory fish such as resident and fluvial bull trout (*Salvelinus*  
93 *confluentus*) have been observed in deeper pools created by larger in-stream structures such as  
94 channel-spanning weirs, but not in the smaller pools created by the engineered log jams (ELJs)  
95 that comprised restoration projects in the river.

96 For this study, I used two closely situated reaches in the lower geomorphic valley segment  
97 (Godaire et al. 2009) of the river ~ 5 km upstream of the Columbia (Figure 1). The restored reach  
98 (river km 4.5-4.9) has N = 11 ELJ and rock structures installed in 2008. The unrestored reach (river  
99 km 5.2-5.5) has N = 11 natural pools usually formed between small boulders, lacking wood cover,  
100 and smaller than the ones created by the structures in the restored reach. Polivka et al. (2015)  
101 showed that this reach is an appropriate control reach.

#### 102 *Fish Capture and Marking*

103 All fish handling was conducted under US Dept. of Commerce, NOAA-Fisheries, Permit No.  
104 1422 and is consistent with guidelines published by the American Fisheries Society (Nickum et al.  
105 2004). Field crews conducted behavioral assays during early in the rearing season (July) of 2009,  
106 2012, 2013, and 2016; gaps in study years occurred when high river flows affected the schedule  
107 of this and concurrent studies (Polivka 2010, Polivka et al. 2015, 2019, Polivka and Claeson in  
108 review), and, in 2014, owing to a large sediment deposition following a fire in the upper basin.

109 Because electrofishing can be invasive for behavioral studies (Mesa and Schreck 1989), crews  
110 captured fish using a 3 m × 1.5 m seine with 3 mm mesh. Because pulling a seine along the cobble  
111 and rock substrate is ineffective, two field-crew members stood at the downstream end of the pool  
112 and held the seine open as two other members snorkeling in the water used large hand nets to  
113 coerce fish into the seine and sometimes to capture fish individually. Underwater visibility in the  
114 Entiat River is 4-5 m such that two snorkelers can see the entire sampled area and account for any  
115 fish, by species, that escaped capture, yielding relatively accurate fish counts. Comparison of five  
116 years of seine capture data and snorkel-only fish counts in this study system showed no difference

117 in abundance patterns (Polivka et al. 2015), indicating that concealment of fish by ELJ structure,  
118 for example, does not substantially affect the ability to capture or recapture fish in restored pools.  
119 Polivka (2010) obtained preliminary data on individual growth by mark and recapture periods  
120 ranging from 15-60 d suggesting reliable capture ability for fish that reside in pools over long  
121 periods of time, relative to the time frame of this study. Relative lack of structure in unrestored  
122 pools increased confidence that all fish were captured; no escaped fish in unrestored pools were  
123 reported in Polivka (2010) or Polivka et al. (2015). At each pool, depth, temperature, current  
124 velocity, pool area and dissolved oxygen were measured.

125 Captured fish were placed in insulated, aerated buckets and mildly anaesthetized with MS-  
126 222 ( $< 0.1 \text{ g} \cdot \text{l}^{-1}$ ) for 2-3 minutes. Sub-yearling fish in this study system range from 50-75  
127 mm (Chinook) and 35-70 mm (steelhead), depending on growth rates. Following identification  
128 and recording of size data (standard length, SL, in mm and mass in g), fish were marked with  
129 a subcutaneous injection of visual implant elastomer (VIE; Northwest Marine Inc.). Following  
130 marking, fish were transferred to another insulated, aerated bucket where they were allowed to  
131 fully recover from anaesthetization. The recovery period was at least 10 min, or after a full righting  
132 response with fish appearing alert and responsive, before they were released to the capture pool.  
133 After 24 hours, the pool was re-sampled and the number of both recaptured individuals and newly  
134 captured unmarked fish were noted.

## 135 *Data Analysis*

### 136 *Affinity patterns over time*

137 Pools in this study system vary widely in fish abundance both within and among restored and  
138 unrestored reaches (Polivka et al. 2015). This has made comparison of mean recapture propor-  
139 tions statistically intractable (Polivka 2010). Across the range of values of fish marked on Day 1  
140 ( $N_{\text{marked}}$ ), the number of recaptures on Day 2 ( $N_{\text{recaptured}}$ ) should increase linearly. The slope ( $\beta$ ) of  
141 the line fit through the data is an estimate of the average recapture probability for that set of pools.  
142 Differences between the slopes (e.g.,  $\beta_{\text{restored}} > \beta_{\text{unrestored}}$ ), evaluated by using a  $N_{\text{marked}} \cdot \text{habi-}$   
143  $\text{tат type term}$  in a linear model would indicate differences in affinity for restored and unrestored  
144 habitat.

145 I specified the models for each species as generalized linear mixed-effects models (GLMMs),

146 assuming a Poisson error distribution. I assumed *a priori* that the relationship between  $N_{\text{recaptured}}$   
147 on Day 2 and  $N_{\text{marked}}$  on Day 1 passed through the origin because pools with no fish captured (or  
148 marked) on Day 1 were excluded. Habitat type and number of fish marked were designated as  
149 fixed effects and year as the random effect. Because pool area is a strong positive correlate of  
150 fish abundance (Polivka et al. 2015), and thus affected the number of fish marked to begin with,  
151 it was entered into each model as an offset parameter to prevent fitting a negative value (Zuur  
152 et al. 2009). This offset also enables some indication that observed habitat selection and affinity  
153 for restored pools is not simply an artifact of restoration creating larger pools. I compared four  
154 candidate GLMMs for each species to determine the importance of habitat and annual effects: 1)  
155 equal slopes of the regression lines for the two habitat types (i.e., no  $N_{\text{marked}} \cdot$  habitat interaction  
156 term) with the random effect (year) included, 2) equal slopes and no random effect, 3) unique  
157 slopes (including interaction term) plus the random effect, 4) unique slopes and no random effect.  
158 I selected the best model using the Akaike Information Criterion (AIC; Burnham and Anderson  
159 2002). If the best model was one of the models that included a  $N_{\text{marked}} \cdot$  habitat type interaction  
160 term, I concluded that fish differed in their affinity for restored vs. unrestored habitat and calculated  
161 habitat-specific  $\beta$ s. Given the multi-year nature of the study, I expected the best model to include  
162 year as a random factor, justifying within-year analyses. To ensure that the offset parameter did  
163 not cause some systematic lack of model fit, I re-ran the analyses with pool area designated as a  
164 simple predictor.

165 To address annual differences and to compare behavior with observations of distribution and  
166 abundance, I used two sets of GLMs for each year: one for behavior (including the interaction term  
167 as above) and one to describe fish abundance on Day 1. I also compared whether physical habitat  
168 characteristics (depth, current velocity, temperature, pool area) are consistent predictors of either  
169  $N_{\text{recaptured}}$  or of Day 1 abundance ( $N_{\text{marked}}$ ). A similar analysis appears in Polivka et al. (2015), but  
170 that study uses repeated data within each year, whereas this analysis uses only data specific to Day 1  
171 of the mark-recapture trials. As such, it is consistent with most restoration effectiveness monitoring  
172 efforts in the region (i.e., single observations of fish abundance; Roni et al. 2015, Hillman et al.  
173 2016).

174 Selection of the best affinity and abundance GLMs proceeded stepwise with the removal of  
175 non-significant ( $p > 0.05$ ) predictors, until the resultant model contained only significant terms.

176 Model output for GLM in R (R Core Team 2018) provides AIC scores and I used these to confirm  
177 that the model with only significant predictors also had the lowest AIC score. These models identi-  
178 fied 1) the years in which  $\beta_{restored}$  and  $\beta_{unrestored}$  indicated different levels of habitat affinity if the  
179 best model had a significant interaction term, 2) whether any differences in affinity corresponded  
180 to differences among habitats in abundance, and 3) whether affinity and abundance were associated  
181 with the same physical attributes of pools.

182 In all models describing affinity, both for individual years and years combined, I considered  
183 potential issues with capture success. On Day 2, captures consisted of  $N_{recaptured}$  + unmarked in-  
184 dividuals. Unmarked individuals were generally assumed to be immigrants into the pool between  
185 Day 1 and Day 2; however, they could also be individuals not captured on Day 1 that remained  
186 in the pool. To determine whether this affected model outcome, I re-analyzed all data by assum-  
187 ing that Day 1 individuals observed to have escaped capture remained in the pool as recaptures.  
188 Assumptions about any Day 2 individuals that were not captured were too weak to justify further  
189 adjustment of the models.

#### 190 *Density-dependent immigration, emigration, and capacity*

191 Total immigration likely depends on pool size, so I first examined the linear relationship be-  
192 tween pool area and total immigrants with linear regression. To determine whether restored pools  
193 allowed for greater density dependent immigration relative to unrestored pools, I took the number  
194 of immigrants (i.e., unmarked fish captured on Day 2) and examined how it was affected by the  
195 density of fish maintaining occupancy of the pool (i.e., recaptured) over the 24 hour period. For  
196 this relationship, I tested the fit of the data to a Ricker-style function (Ricker 1954). Such functions  
197 are of the form  $xe^{1-x}$  and are widely used in fisheries to describe density dependent processes (e.g.,  
198 Sharma et al. 2005). The specific modification used here is:

$$I = Rae^{-bR} + \lambda, \quad (1)$$

199 where  $I$  = number of immigrants,  $R$  = density of recaptured fish and  $a$  and  $b$  describe the shape of  
200 the response curve. The peak level of immigration is  $I = \frac{a}{be}$  at recapture density  $R = \frac{1}{b}$  and  $\lambda$  is  
201 a term added to represent a constant level of density-independent immigration, particularly given  
202 that immigration may be observed at zero density of recaptures. With three parameters in need

203 of estimation ( $a$ ,  $b$  and  $\lambda$ ), data from all years were combined to avoid over-fitting of the model  
204 (Anderson 2008). I used total number of immigrants rather than immigrant *density* because pools  
205 vary in size and density and two pools of a different size can have the same total density. The larger  
206 pool will possibly have the capacity for a greater number of immigrants, but this may translate to  
207 low immigrant density for the relative amount of available habitat. Because the total number of  
208 pools per year sampled on Day 1 was, at most, 11 and was first reduced by the number of fish in  
209 which there were zero captures on Day 1 in any given year, I had insufficient replication to evaluate  
210 random effects of individual years and individual pools. However, those same limitations resulted  
211 in different combinations of pools used each year. Also, different cohorts of fish were sampled  
212 each year; thus, each year's data had a reasonable level of independence and thus were combined  
213 as a whole for analysis.

214 Parameters from Equation (1) for each habitat type (restored or unrestored pools) were esti-  
215 mated by non-linear least squares, which is generally equivalent to maximum likelihood estima-  
216 tion, especially for small sample size when the assumption of normality may not hold (Amemiya  
217 1977, Anh 1988). The output included the 95% confidence interval for each parameter. If the  
218 results showed a large difference in the parameter value, but wide confidence intervals, I used a  
219 randomization procedure to compare the values. I made a random draw from the values in the 95%  
220 confidence interval around the parameter estimate and generated a uniformly distributed set of  
221 10,000 values for each parameter in each habitat. From the set of 10,000 values for that parameter,  
222 I drew, with replacement, 1000 values, and calculated the difference (e.g.,  $a_{restored} - a_{unrestored}$ )  
223 for each pair. I then examined the 95% Highest Density Interval (HDI) for the 1000 values of  
224 that difference. A parameter was considered different between habitats if the 95% HDIs for the  
225 difference did not overlap zero.

226 Examination of density dependent emigration is a simpler process as emigration is expected to  
227 increase linearly with density. However it may also be an artifact of the total number of fish marked  
228 in a pool, total pool area or there may be differences in total emigration by habitat type. Therefore,  
229 I constructed another linear model using each of these parameters. To determine whether habitat  
230 type affected density dependence, I included a habitat  $\times$  density interaction term. I performed  
231 analysis of variance on these models to identify significant predictors of total emigrants.

232 To examine whether condition variability among individuals was correlated with habitat affin-

233 ity as predicted by habitat selection trade-offs, I tested the correlation between the coefficient of  
234 variation in the Fulton Condition Index for fish ( $K$ ; Anderson and Neumann 1996) and habitat  
235 affinity  $\beta$ . The Fulton Index relates length ( $L$ ) and mass ( $m$ ) as:

$$K = \left(\frac{m}{L^3}\right) \times 10^6 \quad (2)$$

236 Although the scaling exponent for  $L$  can vary among species, I used a log(mass) vs. log(length)  
237 regression to determine that the exact value was  $2.997 \pm 0.013$  and thus not meaningfully different  
238 from 3. The key question is whether among-individual variability in condition affects affinity for  
239 a habitat type. Here, I considered pools, whether restored or unrestored and used the  $\beta$  values  
240 obtained from the linear models which already showed relative differences in affinity. I calculated  
241 the coefficient of variation in the condition index (CVCI) among individuals recaptured in each  
242 pool. If a lower CVCI occurs where a habitat trade-off is predicted to be available (i.e., pools;  
243 Railsback and Harvey 2002), then there should be a negative correlation between  $\beta$  and CVCI and  
244 thus stronger affinity indicating state-dependent use of pools. I used the Pearson correlation  $r$  to  
245 evaluate this correlation for both species. If pools offer a trade-off in resources relative to shallower,  
246 faster-flowing habitats (Railsback et al. 1999, Railsback and Harvey 2002), then CVCI and  $\beta$   
247 should be negatively correlated. Specifically, a lower CVCI should be associated with stronger  
248 affinity for pools.

249

## RESULTS

250

### *Affinity patterns by year*

251 For both species, the GLMMs selected by AIC included year as a random factor, and the best  
252 model for each contained a significant interaction term ( $N_{\text{marked}} \times \text{habitat}$ ,  $P < 0.0001$ ), indicating  
253 unique slopes for restored and unrestored pools (Table 1). With all years combined, the affinity  
254 of each species was greater for restored habitat; however, for Chinook, the difference was very  
255 small (Chinook,  $\beta_{\text{restored}} = 0.258 \pm \text{se} = 0.02$ ,  $\beta_{\text{unrestored}} = 0.226 \pm 0.02$ ; steelhead,  $\beta_{\text{restored}} =$   
256  $0.573 \pm 0.04$ ,  $\beta_{\text{unrestored}} = 0.388 \pm 0.02$ ). There was no indication of a systematic lack of fit with  
257 these models, whereas removal of the offset parameter led to problems with convergence in Model  
258 1 (same slope, no random effect). Thus, the original model specification, with offset parameter, is

259 justified.

260 In analyses of individual years, Chinook showed higher affinity for restored pools in 2009 and  
261 2013, but did not differ in habitat affinity in 2012 and marginally favored unrestored habitat in 2016  
262 ( $N_{\text{marked}} \cdot \text{habitat}$ ,  $p = 0.058$ ; Table 2; Figure 2a). Early season habitat affinity and abundance were  
263 concordant in 2009 and 2013 and affinity was typically correlated with similar pool characteristics  
264 as abundance, including deeper, slower flowing water (Table 2). Mean depth in each habitat type  
265 was  $56.5 \pm 20.1$  cm (restored) and  $44.8 \pm 9.6$  cm (unrestored). Mean current velocity was  $18.0$   
266  $\pm 10.0$   $\text{cm} \cdot \text{s}^{-1}$  (restored) and  $32.8 \pm 15.1$   $\text{cm} \cdot \text{s}^{-1}$  (unrestored). Temperature was indicated as a  
267 significant correlate in some models, but the correlation often was opposite in direction for affinity  
268 vs. abundance (Table 2).

269 Steelhead affinity was also variable from year to year (Table 2; Figure 2b) and the strong  
270 difference in  $\beta$  with years combined (above) appeared to be primarily influenced by the strong  
271 difference favoring restored habitat in 2013 (Table 2). Affinity for unrestored habitat was indicated  
272 in 2012; no other year showed a difference in  $\beta$ . Affinity in 2016 could not be determined by  
273 GLM because only three unrestored pools had any marked fish ( $N = 1-2$ ) and, in each case, zero  
274 recaptures. Steelhead abundance favored restored habitats in 2009 and 2013, but not in 2012 or  
275 2016. Physical correlates did not have much explanatory power for either abundance or affinity  
276 in steelhead (Table 2). In both species and both response variables (affinity vs. abundance), the  
277 model resulting from stepwise selection of terms also had the lowest AIC score, thereby validating  
278 stepwise selection.

### 279 *Density-dependent immigration/emigration*

280 Regression analysis showed a significant linear increase in the number of immigrants with pool  
281 area for Chinook ( $F_{1,71} = 20.48$ ,  $p < 0.0001$ ) but not for steelhead ( $F_{1,61} = 0.634$ ,  $p = 0.424$ ). The  
282 fitted Ricker-style functions for each habitat type (Figure 3) indicated a higher peak immigration  
283 level in restored habitat ( $a_{\text{restored}} = 115.2$ ,  $a_{\text{unrestored}} = 27.76$ ) The 95% HDI of this difference  
284 among habitats was  $>$  zero (range = 3.33-225.74, Figure 4). The confidence intervals for  $b$  and  $\lambda$   
285 from each habitat overlapped substantially, so they were not analyzed further. The lack of differ-  
286 ence in the shape parameter  $b$  indicates that peak immigration occurs at the same recapture density  
287 regardless of habitat type and the lack of a difference in  $\lambda$  indicates that habitats have equal levels

288 of density independent immigration, particularly for pools in which all fish emigrated (zero recapture  
289 density). Inspection of a plot of immigrants vs. recaptures revealed no pattern that warranted  
290 fitting the immigration model to steelhead data.

291 The analyses for both Chinook and steelhead emigration indicated some effects of density on  
292 emigration from restored and unrestored pools 3, consistent with movement according to habitat  
293 settlement rules. However, total number of fish marked was the strongest predictor of total number  
294 of emigrants for both species. Density was positively correlated with total emigrants for both  
295 species but there was only a significant habitat  $\times$  density interaction term for steelhead, indicating  
296 a difference in the slopes of the emigrants vs. total density relationship for each habitat. These  
297 were (with 95% credible interval), restored: 9.70 (7.98-11.42) and unrestored: 4.93 (2.78-7.08).

### 298 *Condition dependent movement*

299 A lower coefficient of variation in condition index (CVCI) among individual Chinook salmon  
300 was negatively correlated with affinity ( $\beta$ ) for pools with  $\beta$  values combined for all years and  
301 both restoration types (Pearson  $r = -0.874$ ,  $P = 0.010$ ; Figure 5. This implies that pools offer the  
302 ability to optimize habitat selection trade-offs resulting in reduced variability in condition among  
303 individuals and that these individuals have, on average, stronger affinity for pools. The regression  
304  $\beta$  for restored habitat in 2016 was not significant (Table 2) and was therefore omitted from this  
305 analysis. For steelhead, there was a slight negative, but non-significant correlation between the  
306 coefficient of variation in condition and the slope of the habitat affinity relationship (Pearson  $r = -$   
307  $0.097$ ,  $P = 0.855$ ) and, thus, no indication that selection of pools was related to condition variability.

### 308 DISCUSSION

309 Habitat selection patterns indicated by mark-recapture data and additional inferences about capacity  
310 and behavior indicated a positive overall response to restoration. This result is not surprising in  
311 the context of previous work in this study system (Polivka et al. 2015), and highlights the benefit  
312 of including mark-recapture studies in a multi-year program of restoration effectiveness research.  
313 This is an important extension of that previous work because it not only confirms the dependence  
314 of observations on year and species (Pess et al. 2012, Polivka et al. 2015), but it also provides

315 some mechanistic details, such as density- and state-dependence to extend inferences beyond the  
316 high variability of single annual surveys of distribution and abundance (Roni et al. 2008, White-  
317 way et al. 2010). These details usually bolstered the results of abundance surveys for Chinook, but  
318 sometimes contradicted them for steelhead, and exacerbated the difficulty of making conclusions  
319 about steelhead response to restoration.

320 It is unclear why, with years combined, there was a relatively small affinity difference ( $\beta_{restored} -$   
321  $\beta_{unrestored}$ ) between the two habitat types for Chinook. Assuming this is not a case where a quanti-  
322 tative difference is not biologically meaningful, one issue might be that the assumption of a linear  
323 recapture function, above some number of individuals initially marked in a given habitat, may not  
324 hold. At high population levels, density dependence may cause the number of recaptured individ-  
325 uals to decelerate as the number marked grows. This did not appear to be the case over the range  
326 of Day 1 capture numbers observed here, but could become evident with more frequent mark-  
327 recapture observations with high initial fish density. Regardless, density-dependent immigration  
328 suggests that the habitats in this system might already be fairly well saturated, and linear models  
329 may still be appropriate to estimate basic site fidelity.

330 The linear approach to habitat selection behavior here is analogous to the use of isodars (Morris  
331 1988) and suggests that isodars could potentially extend the understanding of behavioral mecha-  
332 nisms associated with the response to habitat restoration. Isodars help identify the extent to which  
333 individuals perceive a difference in habitat quality, and how density dependence resulting from the  
334 presence of conspecifics or heterospecifics affects settlement of (Muller et al. 1997), and switching  
335 between habitats (Greene and Stamps 2001). Consequences of spatial and temporal overlap in  
336 habitat and potential interspecific competition between Chinook and steelhead, in the context of  
337 restoration, is outside the scope of this work, but is under separate analysis (unpublished data).

338 Most habitat restoration is implemented under the assumption that amelioration of some lim-  
339 iting physical characteristic is the key to species recovery (Roni et al. 2002, 2008, Hillman et al.  
340 2016). Although there was generally a consistent influence of depth and current velocity as cor-  
341 relates of Chinook abundance and habitat affinity, the models did not consistently identify a given  
342 factor in each year. Furthermore, there was almost no correlation between physical characteristics  
343 and either steelhead abundance or behavior and these only showed modest effects given multi-  
344 ple sampling occasions within and among years (Polivka et al. 2015). Thus, focus of restoration

345 primarily on manipulation of physical habitat characteristics may neglect to address other mecha-  
346 nisms important to population recovery and measurement of changes in physical habitat parameters  
347 may not be suitable metrics of a realized benefit to fish.

348 It was through multi-year data in both past (Polivka et al. 2015), and this present work that  
349 benefits to restoration in this study system could be inferred. The four study years, taken indi-  
350 vidually, highlighted the variability that leads to the frequent observation that positive response to  
351 restoration can be inconsistent (Smokorowski and Pratt 2007, Roni et al. 2008, Whiteway et al.  
352 2010). Although strengthened by multi-year data, the comparison here was between individual  
353 restored pools within a single reach and individual restored pools in an unrestored reach. Data  
354 from multiple reaches would likely also increase the robustness of all biological inferences. New  
355 reaches have been restored with ELJs in this sub-basin since 2012; however, three of those reaches  
356 occur in the upper valley segment of the river (Godaire et al. 2009), and those that are in the lower  
357 valley segment have fewer structures ( $N = 4-8$ ) than the restored reach studied here. This has made  
358 it difficult, both practically and statistically, to combine reaches (K. M. Polivka and S. M. Claeson,  
359 *submitted manuscript*), which also lack data from earlier years due to the timing of restoration.

360 Because the design of these mark-recapture studies also made it possible to make inferences  
361 about density- and state-dependent habitat movements, they provide additional mechanistic detail  
362 regarding fish response to restoration. Showing that restored pools had higher capacity for immi-  
363 gration by Chinook across the observed density of fish occupying pools of either habitat type is  
364 an example of a result that goes beyond observations of distribution and abundance. Density de-  
365 pendent emigration did not inform conclusions about capacity increases due to habitat restoration.  
366 Even the habitat difference in steelhead was most likely attributable primarily to association with  
367 more total marked fish contributing to the number of fish moving out of the two habitats, particu-  
368 larly given no density-dependent immigration in this species. Life cycle models make predictions  
369 about whole-population responses to restoration based, in part, on hypothetical capacity increases  
370 (Scheuerell et al. 2006, Honea et al. 2009). Until there is understanding of the wide variability  
371 in the response of fish to restoration, such as the capacity increases shown here, across additional  
372 reaches, or in other sub-basins, however, whole-life-cycle inferences may be difficult.

373 Nevertheless, short-term evidence that body condition (correlated with survival) is affected by  
374 restoration in a beneficial way was supported by the negative correlation between variation and

375 condition and habitat affinity for Chinook. A strong trade-off between foraging and predation  
376 risk, such as that indicated for stream pools (Railsback et al. 1999, Railsback and Harvey 2002,  
377 Railsback et al. 2005), is predicted to reduce variation among individuals in body condition (Clark  
378 1994, Cresswell 1998, Kotler et al. 2010, Polivka 2011). Limited prior evidence has been found in  
379 study systems similar to this one (Bradford and Higgins 2001) and here, detection of the pattern  
380 required examination of fish selection for pools regardless of restoration status. Nevertheless, there  
381 is a strong correlation between Chinook abundance and pool area in this study system (Polivka et al.  
382 2015). Because condition variation among individuals has implications for longer-term fitness  
383 (Kotler et al. 2010), creation of larger pools through restoration with ELJs may help to optimize  
384 fitness for a greater number of individuals based on state-dependent habitat selection (Nonacs  
385 2001).

386 Site fidelity studies of this kind are applied across many taxonomic groups (Webb and Shine  
387 1997, Sommerfeld et al. 2015) and the behavioral patterns observed can indicate the animal's  
388 perception of habitat quality (Heap et al. 2014). Although behavioral assays are not usually part of  
389 fish habitat restoration effectiveness studies (but see Freedman et al. 2016), I show here that they  
390 may yield more robust ways of inferring benefits of restoration at the individual and, to a lesser  
391 extent, population levels. Such an approach can prevent overconfidence in single observations of  
392 distribution and abundance and even indicate a benefit of restoration when there is no observed  
393 difference in abundance between restored and unrestored habitat.

#### 394 ACKNOWLEDGEMENTS

395 Cascadia Conservation District sponsors restoration projects in the Entiat River and provided field  
396 assistants. I thank S. Eichler, R. Logan, A. Bushy, K. Tackman, J. West, J. Novak, K. Logan, J.  
397 Jorgensen, H. Porter, B. Forney, R. Hosman, S. Kaech, C. Skalisky, and S. Claeson for collection  
398 and curation of field data during the various years of the study. A. Bushy was supported by the  
399 American Fisheries Society Hutton Junior Fisheries Biology Scholarship. Reviews of earlier drafts  
400 and helpful input were provided by G. Dwyer, A. Rosenberger, M. Malone, S. Claeson, and R.  
401 Flitcroft.

REFERENCES

402

403 Alofs, K. M., and K. M. Polivka. 2004. Microhabitat-scale influences of resources and refuge on  
404 habitat selection by an estuarine opportunist fish. *Marine Ecology Progress Series* **271**:297–306.

405 Amemiya, T. 1977. The maximum likelihood and the nonlinear three-stage least squares estimator  
406 in the general nonlinear simultaneous equation model. *Econometrica: Journal of the Economet-*  
407 *ric Society* pages 955–968.

408 Anderson, D. R. 2008. *Model based inference in the life sciences: a primer on evidence*. Springer  
409 Science & Business Media.

410 Anderson, R. O., and R. M. Neumann. 1996. Length, weight, and associated structural indices.  
411 *Fisheries techniques*, 2nd edition. American Fisheries Society, Bethesda, Maryland **5**:447–482.

412 Anh, V. 1988. Nonlinear least squares and maximum likelihood estimation of a heteroscedastic  
413 regression model. *Stochastic Processes and their Applications* **29**:317–333.

414 Bennett, S., G. Pess, N. Bouwes, P. Roni, R. E. Bilby, S. Gallagher, J. Ruzycki, T. Buehrens,  
415 K. Krueger, W. Ehinger, et al. 2016. Progress and challenges of testing the effectiveness of  
416 stream restoration in the Pacific Northwest using Intensively Monitored Watersheds. *Fisheries*  
417 **41**:92–103.

418 Block, W. M., A. B. Franklin, J. P. Ward, J. L. Ganey, and G. C. White. 2001. Design and im-  
419 plementation of monitoring studies to evaluate the success of ecological restoration on wildlife.  
420 *Restoration Ecology* **9**:293–303.

421 Bond, N., and P. Lake. 2003. Characterizing fish–habitat associations in streams as the first step  
422 in ecological restoration. *Austral Ecology* **28**:611–621.

423 Borkholder, B. D., S. D. Morse, H. T. Weaver, R. A. Hugill, A. T. Linder, L. M. Schwarzkopf, T. E.  
424 Perrault, M. J. Zacher, and J. A. Frank. 2002. Evidence of a year-round resident population  
425 of lake sturgeon in the Kettle River, Minnesota, based on radiotelemetry and tagging. *North*  
426 *American Journal of Fisheries Management* **22**:888–894.

- 427 Bradford, M. J., and P. S. Higgins. 2001. Habitat-, season-, and size-specific variation in diel  
428 activity patterns of juvenile chinook salmon (*Oncorhynchus tshawytscha*) and steelhead trout  
429 (*O. mykiss*). Canadian Journal of Fisheries and Aquatic Sciences **58**:365–374.
- 430 Brown, J. S., and B. P. Kotler. 2004. Hazardous duty pay and the foraging cost of predation.  
431 Ecology letters **7**:999–1014.
- 432 Clark, C. W. 1994. Antipredator behavior and the asset-protection principle. Behavioral Ecology  
433 **5**:159–170.
- 434 Cresswell, W. 1998. Diurnal and seasonal mass variation in blackbirds *Turdus merula*: conse-  
435 quences for mass-dependent predation risk. Journal of Animal Ecology **67**:78–90.
- 436 Ferrari, M. C., C. K. Elvidge, C. D. Jackson, D. P. Chivers, and G. E. Brown. 2010. The responses  
437 of prey fish to temporal variation in predation risk: sensory habituation or risk assessment?  
438 Behavioral Ecology **21**:532–536.
- 439 Freedman, R. M., C. Espasandin, E. F. Holcombe, C. R. Whitcraft, B. J. Allen, D. Witting, and  
440 C. G. Lowe. 2016. Using Movements and Habitat Utilization as a Functional Metric of Restora-  
441 tion for Estuarine Juvenile Fish Habitat. Marine and Coastal Fisheries **8**:361–373.
- 442 Fretwell, S. D., and H. Lucas. 1970. On territorial behavior and other factors influencing habitat  
443 distribution in birds. I. Theoretical development. Acta Biotheor **19**:16–36.
- 444 Giannico, G. R., and M. C. Healey. 1999. Ideal free distribution theory as a tool to examine  
445 juvenile coho salmon (*Oncorhynchus kisutch*) habitat choice under different conditions of food  
446 abundance and cover. Canadian Journal of Fisheries and Aquatic Sciences **56**:2362–2373.
- 447 Godaire, J., K. Russell, and J. Bountry, 2009. Entiat tributary assessment, Chelan Co., Washington.  
448 Technical report, US Bureau of Reclamation, Denver, CO.
- 449 Greene, C. M., and J. A. Stamps. 2001. Habitat selection at low population densities. Ecology  
450 **82**:2091–2100.
- 451 Greenwood, P. J. 1980. Mating systems, philopatry and dispersal in birds and mammals. Animal  
452 Behaviour **28**:1140–1162.

- 453 Gundersen, G., H. P. Andreassen, and R. A. Ims. 2002. Individual and population level deter-  
454 minants of immigration success on local habitat patches: an experimental approach. *Ecology*  
455 *Letters* **5**:294–301.
- 456 Heap, S. M., D. Stuart-Fox, and P. G. Byrne. 2014. Reduction in site fidelity with smaller spatial  
457 scale may suggest scale-dependent information use. *Behavioral Ecology* **26**:543–549.
- 458 Hillman, T., P. Roni, and J. O’Neal. 2016. Effectiveness of tributary habitat enhancement projects.  
459 Report to Bonneville Power Administration, Portland, OR .
- 460 Hillman, T. W., J. Griffith, and W. Platts. 1987. Summer and winter habitat selection by juvenile  
461 Chinook salmon in a highly sedimented Idaho stream. *Transactions of the American Fisheries*  
462 *Society* **116**:185–195.
- 463 Honea, J. M., J. C. Jorgensen, M. M. McClure, T. D. Cooney, K. Engie, D. M. Holzer, and  
464 R. Hilborn. 2009. Evaluating habitat effects on population status: influence of habitat restoration  
465 on spring-run Chinook salmon. *Freshwater Biology* **54**:1576–1592.
- 466 Houston, A. I. 2008. Matching and ideal free distributions. *Oikos* **117**:978–983.
- 467 Houston, A. I., J. M. McNamara, and J. M. Hutchinson. 1993. General results concerning the  
468 trade-off between gaining energy and avoiding predation. *Philosophical Transactions of the*  
469 *Royal Society of London B: Biological Sciences* **341**:375–397.
- 470 Kahler, T. H., P. Roni, and T. P. Quinn. 2001. Summer movement and growth of juvenile  
471 anadromous salmonids in small western Washington streams. *Canadian Journal of Fisheries*  
472 *and Aquatic Sciences* **58**:1947–1956.
- 473 Kennedy, M., and R. D. Gray. 1993. Can ecological theory predict the distribution of foraging  
474 animals? A critical analysis of experiments on the ideal free distribution. *Oikos* pages 158–166.
- 475 Kotler, B. P., J. Brown, S. Mukherjee, O. Berger-Tal, and A. Bouskila. 2010. Moonlight avoidance  
476 in gerbils reveals a sophisticated interplay among time allocation, vigilance and state-dependent  
477 foraging. *Proceedings of the Royal Society of London B: Biological Sciences* **277**:1469–1474.

- 478 Kotler, B. P., D. W. Morris, and J. S. Brown, 2016. Conservation Behavior: Applying Behavioral  
479 Ecology to Wildlife Conservation and Management, Chapter direct behavioral indicators as a  
480 conservation and management tool . Cambridge University Press, Cambridge.
- 481 McMillan, J. R., M. C. Liermann, J. Starr, G. R. Pess, and X. Augerot. 2013. Using a stream net-  
482 work census of fish and habitat to assess models of juvenile salmonid distribution. Transactions  
483 of the American Fisheries Society **142**:942–956.
- 484 McNamara, J. M., and A. I. Houston. 1990. The value of fat reserves and the tradeoff between  
485 starvation and predation. Acta biotheoretica **38**:37–61.
- 486 Merkle, J., D. Fortin, and J. M. Morales. 2014. A memory-based foraging tactic reveals an adaptive  
487 mechanism for restricted space use. Ecology letters **17**:924–931.
- 488 Mesa, M. G., and C. B. Schreck. 1989. Electrofishing mark–recapture and depletion methodologies  
489 evoke behavioral and physiological changes in cutthroat trout. Transactions of the American  
490 Fisheries Society **118**:644–658.
- 491 Morris, D. W. 1988. Habitat-dependent population regulation and community structure. Evolu-  
492 tionary Ecology **2**:253–269.
- 493 Muller, K., J. Stamps, V. Krishnan, and N. Willits. 1997. The effects of conspecific attraction  
494 and habitat quality on habitat selection in territorial birds (*Troglodytes aedon*). The American  
495 Naturalist **150**:650–661.
- 496 Myrvold, K. M., and B. P. Kennedy. 2016. Juvenile steelhead movements in relation to stream  
497 habitat, population density, and body size: consequences for individual growth rates. Canadian  
498 Journal of Fisheries and Aquatic Sciences **73**:1520–1529.
- 499 Nickum, J., H. Bart Jr, P. Bowser, I. Greer, C. Hubbs, J. Jenkins, J. MacMillan, J. Rachlin, J. Rose,  
500 P. Sorensen, et al. 2004. Guidelines for the use of fishes in research. Fisheries **29**:26–27.
- 501 Nonacs, P. 2001. State dependent behavior and the marginal value theorem. Behavioral Ecology  
502 **12**:71–83.

- 503 Pess, G. R., M. Liermann, M. McHenry, R. Peters, and T. Bennett. 2012. Juvenile salmon response  
504 to the placement of engineered log jams (ELJs) in the Elwha River, Washington State, USA.  
505 *River Research and Applications* **28**:872–881.
- 506 Polivka, C. M., and S. M. Claeson. in review. Demonstration that fish habitat restoration increases  
507 capacity beyond simple redistribution of fish in the Entiat River, WA. *North American Journal*  
508 *of Fisheries Management* .
- 509 Polivka, C. M., R. A. Volking, S. M. Claeson, and R. D. Hosman. 2019. Scale of monitoring  
510 influences interpretation of stream habitat restoration results for juvenile Chinook salmon .
- 511 Polivka, K., 2010. Population ecology and effectiveness monitoring of smallscale instream habitat  
512 restoration structures in the Entiat River. *in* Upper Columbia Regional Technical Team 2010  
513 Analysis Workshop Synthesis Report. Edited by MB Ward, J. Morgan, and C. Baldwin. Prepared  
514 for the Upper Columbia Salmon Recovery Board by the Upper Columbia Regional Technical  
515 Team and Terraqua, Inc., Wenatchee, Wash., UCSRB.
- 516 Polivka, K. M. 2007. Use of techniques from foraging theory to quantify the cost of predation for  
517 benthic fishes. *Transactions of the American Fisheries Society* **136**:1778–1790.
- 518 Polivka, K. M. 2011. Responses to the Foraging/Predation Risk Trade-Off and Individual Vari-  
519 ability in Population-Level Fitness Correlates. *ISRN Ecology* **2011**.
- 520 Polivka, K. M., E. A. Steel, and J. L. Novak. 2015. Juvenile salmon and steelhead occupancy  
521 of stream pools treated and not treated with restoration structures, Entiat River, Washington.  
522 *Canadian Journal of Fisheries and Aquatic Sciences* **72**:166–174.
- 523 R Core Team, 2018. R: A Language and Environment for Statistical Computing. R Foundation for  
524 Statistical Computing, Vienna, Austria. URL <https://www.R-project.org/>.
- 525 Railsback, S. F., and B. C. Harvey. 2002. ANALYSIS OF HABITAT-SELECTION RULES USING  
526 AN INDIVIDUAL-BASED MODEL. *Ecology* **83**:1817–1830.
- 527 Railsback, S. F., B. C. Harvey, J. W. Hayse, and K. E. LaGory. 2005. Tests of theory for diel  
528 variation in salmonid feeding activity and habitat use. *Ecology* **86**:947–959.

- 529 Railsback, S. F., R. H. Lamberson, B. C. Harvey, and W. E. Duffy. 1999. Movement rules for  
530 individual-based models of stream fish. *Ecological Modelling* **123**:73–89.
- 531 Rémy, A., J.-F. Galliard, M. Odden, and H. P. Andreassen. 2014. Concurrent effects of age class  
532 and food distribution on immigration success and population dynamics in a small mammal.  
533 *Journal of Animal Ecology* **83**:813–822.
- 534 Ricker, W. E. 1954. Stock and recruitment. *Journal of the Fisheries Board of Canada* **11**:559–623.
- 535 Rodríguez, M. A. 2002. Restricted movement in stream fish: the paradigm is incomplete, not lost.  
536 *Ecology* **83**:1–13.
- 537 Roni, P., T. J. Beechie, R. E. Bilby, F. E. Leonetti, M. M. Pollock, and G. R. Pess. 2002. A review  
538 of stream restoration techniques and a hierarchical strategy for prioritizing restoration in Pacific  
539 Northwest watersheds. *North American Journal of Fisheries Management* **22**:1–20.
- 540 Roni, P., K. Hanson, and T. Beechie. 2008. Global review of the physical and biological ef-  
541 fectiveness of stream habitat rehabilitation techniques. *North American Journal of Fisheries*  
542 *Management* **28**:856–890.
- 543 Roni, P., C. Jordan, and G. Pess. 2015. Basin scale monitoring of river restoration: recommenda-  
544 tions from case studies in the Pacific Northwest USA. *American Fisheries Society, Symposium*  
545 **78**:73–98.
- 546 Scheuerell, M. D., R. Hilborn, M. H. Ruckelshaus, K. K. Bartz, K. M. Lagueux, A. D. Haas,  
547 and K. Rawson. 2006. The Shiraz model: a tool for incorporating anthropogenic effects and  
548 fish–habitat relationships in conservation planning. *Canadian Journal of Fisheries and Aquatic*  
549 *Sciences* **63**:1596–1607.
- 550 Sharma, R., A. B. Cooper, and R. Hilborn. 2005. A quantitative framework for the analysis of  
551 habitat and hatchery practices on Pacific salmon. *Ecological Modelling* **183**:231–250.
- 552 Sinclair, A., and P. Arcese. 1995. Population consequences of predation-sensitive foraging: The  
553 Serengeti wildebeest. *Ecology* **76**:882–891.

- 554 Smokorowski, K., and T. Pratt. 2007. Effect of a change in physical structure and cover on fish  
555 and fish habitat in freshwater ecosystems—a review and meta-analysis. *Environmental Reviews*  
556 **15**:15–41.
- 557 Sogard, S. M., T. H. Williams, and H. Fish. 2009. Seasonal patterns of abundance, growth, and site  
558 fidelity of juvenile steelhead in a small coastal California stream. *Transactions of the American*  
559 *Fisheries Society* **138**:549–563.
- 560 Sommerfeld, J., T. Stokes, and G. B. Baker. 2015. Breeding success, mate-fidelity and nest-site  
561 fidelity in Red-tailed Tropicbirds (*Phaethon rubricauda*) on Christmas Island, Indian Ocean.  
562 *Emu* **115**:214–222.
- 563 Stranko, S. A., R. H. Hilderbrand, and M. A. Palmer. 2012. Comparing the fish and benthic  
564 macroinvertebrate diversity of restored urban streams to reference streams. *Restoration Ecology*  
565 **20**:747–755.
- 566 Switzer, P. V. 1993. Site fidelity in predictable and unpredictable habitats. *Evolutionary Ecology*  
567 **7**:533–555.
- 568 Webb, J. K., and R. Shine. 1997. A field study of spatial ecology and movements of a threatened  
569 snake species, *Hoplocephalus bungaroides*. *Biological Conservation* **82**:203–217.
- 570 Whiteway, S. L., P. M. Biron, A. Zimmermann, O. Venter, and J. W. Grant. 2010. Do in-stream  
571 restoration structures enhance salmonid abundance? A meta-analysis. *Canadian Journal of*  
572 *Fisheries and Aquatic Sciences* **67**:831–841.
- 573 Zuur, A. F., E. N. Ieno, N. J. Walker, A. A. Saveliev, and G. M. Smith, 2009. Mixed effects  
574 modeling for nested data. Pages 101–139 *in* *Mixed Effects Models and Extensions in Ecology*  
575 *with R*. Springer.

TABLE 1: Generalized linear mixed effects model (GLMM) fits of number of recaptures to number initially marked in 24hr site fidelity assays in restored vs. unrestored pools (2009, 2012, 2013, 2016). Models considered were: 1) fit lines with equal slopes for both habitats (no  $N_{\text{marked}} \times$  habitat interaction term included) and including study year as a random factor, 2) equal slopes and no random effect, 3) unique slopes (with interaction term) and the random effect, 4) unique slopes and no random effect. Model selection by AIC (best fit model in boldface).

| Model                    | Slopes        | Year effect | Affinity        | $\Delta$ AIC |
|--------------------------|---------------|-------------|-----------------|--------------|
| <i>a) Chinook Salmon</i> |               |             |                 |              |
| <b>3</b>                 | <b>unique</b> | <b>yes</b>  | <b>restored</b> | <b>0</b>     |
| 1                        | same          | yes         | NA              | 17.2         |
| 4                        | unique        | no          | restored        | 86.0         |
| 2                        | same          | no          | NA              | 99.6         |
| <i>b) Steelhead</i>      |               |             |                 |              |
| <b>3</b>                 | <b>unique</b> | <b>yes</b>  | <b>restored</b> | <b>0</b>     |
| 1                        | same          | yes         | NA              | 8.2          |
| 4                        | unique        | no          | restored        | 9.0          |
| 2                        | same          | no          | NA              | 18.6         |

TABLE 2: GLM analysis indicating year by year affinity differences for restored or unrestored habitat identified by  $N_{\text{marked}} \times \text{habitat}$  (significant differences among habitats in slope ( $\beta$ ) shown in bold). From separate GLMs, significant abundance differences among restored and unrestored habitats. For both affinity and abundance, models were selected by stepwise removal of non-significant terms. Significant positive (+) and negative (-) correlations of physical habitat parameters shown for each group of models. \*Non-significant slopes; NA: Zero recaptures in N=3 pools, only 1-2 fish marked per pool

| Year                | $\beta_{\text{restored}}$ | $\beta_{\text{unrestored}}$ | Affinity correlates                     | Abundance | Abundance correlates                                   |
|---------------------|---------------------------|-----------------------------|-----------------------------------------|-----------|--------------------------------------------------------|
| <i>a) Chinook</i>   |                           |                             |                                         |           |                                                        |
| 2009                | <b>0.259</b>              | 0.105                       | pool area (+), depth(+), current (-)    | restored  | depth (+), temperature (+)                             |
| 2012                | 0.186                     | 0.270                       | depth (+), current (-), temperature (-) | restored  | depth (+), current (-), temperature (-)                |
| 2013                | <b>0.307</b>              | 0.248                       | pool area (+), temperature (+)          | restored  | pool area (+), depth (+), current (-), temperature (+) |
| 2016                | 0.019*                    | <b>0.219</b>                | temperature (-)                         | NS        | depth (-)                                              |
| <i>b) Steelhead</i> |                           |                             |                                         |           |                                                        |
| 2009                | 0.592                     | 0.586                       | current (-), temperature (-)            | restored  | current (-), temperature (+)                           |
| 2012                | 0.250                     | <b>0.603</b>                | NS                                      | NS        | NS                                                     |
| 2013                | <b>0.542</b>              | 0.081*                      | NS                                      | restored  | NS                                                     |
| 2016                | 0.206                     | NA                          | NS                                      | NS        | NS                                                     |

TABLE 3: Analysis of variance on a linear model showing the effects on total number of Chinook (a) and steelhead (b) emigrants from restored (N = 11) and unrestored (N = 10) pools during the first 24 h after capture and marking. Significant density dependence indicated by \*; total emigration was correlated with total density for both species, but density dependence via a significant habitat × density interaction term was indicated only for steelhead.

| Response                 | df | MS    | F      | <i>p</i> |
|--------------------------|----|-------|--------|----------|
| <i>a) Chinook Salmon</i> |    |       |        |          |
| $N_{\text{marked}}$      | 1  | 59852 | 2980.6 | <0.0001  |
| Pool area                | 1  | 161.0 | 8.02   | 0.006    |
| Total density            | 1  | 99.0  | 4.92   | 0.030*   |
| Habitat                  | 2  | 17.0  | 0.87   | 0.424    |
| Habitat × density        | 1  | 17.0  | 0.88   | 0.355    |
| Resid.                   | 67 | 20.0  |        |          |
| <br><i>b) Steelhead</i>  |    |       |        |          |
| $N_{\text{marked}}$      | 1  | 880   | 256.7  | <0.0001  |
| Pool area                | 1  | 11.29 | 3.29   | 0.075    |
| Total density            | 1  | 46.85 | 13.66  | 0.0005*  |
| Habitat                  | 2  | 1.15  | 0.334  | 0.7517   |
| Habitat × density        | 1  | 42.90 | 12.51  | 0.0008*  |
| Resid.                   | 58 | 4.11  |        |          |



FIG. 1: Map of the segment of the Entiat River where study reaches containing restored and unrestored pools were located (RK = river kilometer, measured upstream from confluence with Columbia River).



FIG. 2: Habitat affinity, shown as the linear fit of  $N_{recaptured}$  vs.  $N_{marked}$  for restored (solid lines, filled symbols) and unrestored (dashed lines, open symbols) in 24-hr mark-recapture assays in each year for sub-yearling Chinook salmon and steelhead. Overall habitat differences in affinity for all years combined indicated by GLMM fits described in Table 1; slopes of lines and significant within-year differences given in Table 2.



FIG. 3: Immigration of young of the year Chinook Salmon into restored (solid line, filled circles) and unrestored (dashed line, open circles) pools over a 24-h period as a function of the density of fish maintaining affinity for those pools over that period (recaptures). Density dependence is described by the fit of the Ricker model curve (see Eq. 1) and non-linear least squares estimation of parameters indicates higher total immigration (significantly different  $a$  term in Eq. 1) in restored pools (see Fig. 4



FIG. 4: Histogram with 95% Highest Density Interval (HDI) for the habitat difference in the  $a$  parameter of the Equation 1 describing density-dependent immigration into restored or unrestored pools (see Fig. 3). See text for description of the derivation of the HDI. The 95% bounds (dashed lines) show  $a_{restored} - a_{unrestored} > 0$ , indicating restored pools have a higher immigration capacity for a given density of individuals remaining in the pool (i.e.,  $a_{restored} > a_{unrestored}$ ).



FIG. 5: Correlation between the strength of juvenile Chinook habitat affinity, indicated by the slopes ( $\beta$ ) in each habitat type (taken from Table 2) and the coefficient of variation in condition index ( $K$ ; CVCI) of recaptured individuals in each habitat type and year. When considering all years and habitats, stronger affinity for pools (regardless of restoration) was correlated with a lower CVCI ( $p = 0.010$ ). Data from restored habitat in 2016 were omitted because  $\beta$  was not significantly different from zero.
